# Supplementary material for: Safety study of malapposition of the bio-corrodible nitrided iron stent in vivo
Source: publisher site journal article supplement (doi:10.1515/ntrev-2021-0062), 2021-01-01
Supplement: Supplementary file 1 [file ntrev-2021-0062_sm.pdf]

# Supplementary material

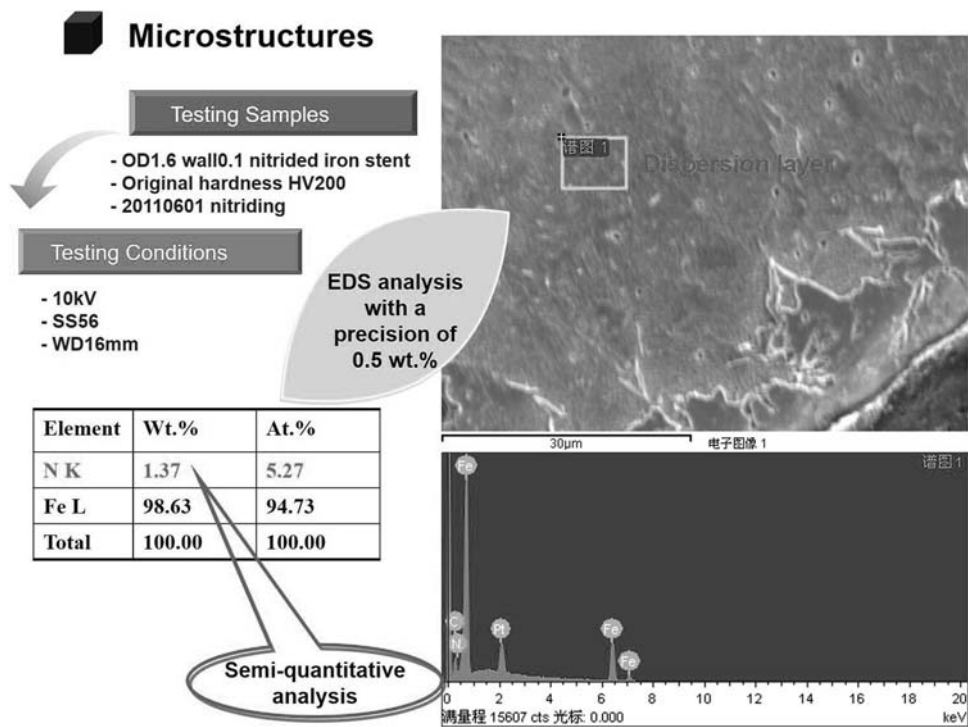

**Figure S1:** The SEM observation of the nitride iron surface and the corresponding EDS analysis.
